1 Too attractive to self: How pollinators can interfere with the evolution of selfing.

2

3 Spigler, RB, LM Smith-Ramesh, and S Kalisz

4

5 Keywords: adaptive dynamics, floral costs, mixed mating, pollen discounting, selfing, selfing

6 syndrome, pollen limitation

7

8 **ABSTRACT**

9 Pollinators are widely invoked to explain the evolution of selfing despite genetic conditions  
10 favoring outcrossing. But their role in maintaining outcrossing despite genetic conditions  
11 favoring selfing remains unexplored. We use consumer-resource models to explicitly consider  
12 the how the plant-pollinator mutualism can constrain the evolution of selfing. We model  
13 outcrossing as a function of attractiveness and account for the cost of attractiveness as a  
14 saturating, linear, or exponential function alongside the costs of selfing: inbreeding depression  
15 and pollen discounting. We show specific, clear combinations of ecological and genetic  
16 conditions where pure selfing can invade a resident population of partial selfers. Complete  
17 selfing can evolve in the face of pollen discounting so long as there is a cost to pollinator  
18 attraction and reward. However, we also predict conditions under which mixed mating is  
19 maintained even when inbreeding depression is low. Our model highlights how under some  
20 scenarios mixed mating represents the worst of both worlds, leaving plants to pay the costs of  
21 both inbreeding depression and attraction and even leading to extinction. By linking pollinator  
22 attraction to the selfing rate, our models provide a likely common mechanism to explain pollen  
23 discounting and an alternative evolutionary pathway to the selfing syndrome.

## 24 INTRODUCTION

25           The evolutionary transition from outcrossing to selfing is considered among the most  
26 common in Angiosperms (Stebbins, 1974). Classic models predicting this transition hinge on the  
27 balance between two genetic factors: inbreeding depression and an automatic transmission  
28 advantage (or cost of outcrossing) (Fisher, 1941; Nagylaki, 1976; Lloyd, 1979; Charlesworth,  
29 1980; Lande and Schemske, 1985). Because complete outcrossers have only two pathways to  
30 pass on their alleles (i.e. outcross seed, outcross siring) but partial selfers have three (i.e. outcross  
31 seed, selfed seed, outcross siring), partial selfers should establish and spread within an  
32 outcrossing population. That is, unless the reduction in fitness of selfed offspring relative to  
33 outcrossed offspring through inbreeding depression is great enough to eliminate the 50%  
34 automatic transmission advantage of selfing. Consequently, there should be disruptive selection  
35 on the mating system. Despite early empirical data supporting this prediction (Schemske and  
36 Lande, 1985), more recent analyses indicate that 63% of species have at least one population  
37 with a mixture of selfing and outcrossing ('mixed mating'; Whitehead *et al.*, 2018) and 12% are  
38 outcrossing despite low inbreeding depression (Winn *et al.*, 2011). Thus, the quest to understand  
39 the drivers of mating system evolution endures.

40           While original models emphasize the role of genetic factors, mating in most flowering  
41 plants is an ecological process involving interactions with pollinators. Not surprisingly,  
42 consideration of pollination conditions, most notably pollen limitation, has solved part of the  
43 problem of mixed mating (reviewed in Goodwillie, *et al.*, 2005; Knight *et al.*, 2005). Theoretical  
44 and empirical work illustrates how partial selfing can be favored in the face of high inbreeding  
45 depression if such selfing boosts seed production compared to outcrossed individuals when  
46 mates or pollinators are limiting (Lande and Schemske, 1985; Lloyd, 1992; Jarne and

47 Charlesworth, 1993; Kalisz, *et al.*, 2004; Eckert, *et al.*, 2006). Indeed, selection for reproductive  
48 assurance in the face of pollen limitation is the most well accepted force favoring the evolution  
49 of selfing more generally (Busch and Delph, 2012). However, reproductive assurance alone  
50 cannot explain why outcrossing persists in spite of low inbreeding depression, underscoring that  
51 we have not yet fully explored the conditions that favor or constrain the evolution of selfing.

52       Explicit consideration of pollination as a mutualism involving plant and pollinator as  
53 equally interdependent actors can highlight how pollinators might constrain the evolution of  
54 selfing (Devaux *et al.*, 2014; Lepers, *et al.*, 2014; Spigler and Kalisz, 2017). Pollinators depend  
55 critically on floral resources for their own metabolic demands and for provisioning their broods.  
56 As long as this dependence exists and their local abundances are great enough, pollinators could  
57 enforce outcrossing, even if plants are capable of autonomous selfing and even if genetic  
58 conditions favor selfing (i.e., inbreeding depression is low) (Spigler and Kalisz, 2017). Near  
59 exclusive focus on the role of pollen limitation on mating system evolution has neglected this  
60 possibility, and it is worth noting that pollen limitation is often negligible and not necessarily  
61 ubiquitous (Knight *et al.*, 2005; Rosenheim *et al.*, 2014; Rosenheim *et al.*, 2016; but see Burd,  
62 2016). Holsinger (1991) recognized the impact of pollinator abundance and plant density on the  
63 evolution of selfing and rooted his single-locus model of the evolution of mixed mating on a  
64 simple fact: the outcrossing rate is a function of how much outcross pollen is received. Also  
65 explicit is the ecological trade-off of pollen discounting: pollen used for selfing cannot be used  
66 for outcrossing and vice versa (Nagylaki, 1976b Charlesworth, 1980; Holsinger, *et al.*, 1984;  
67 Holsinger, 1991). In considering the ecological dynamics of pollinators and pollen discounting,  
68 Holsinger (1991) demonstrated theoretically not only that outcrossing could be favored in the  
69 absence of inbreeding depression but also that complete selfing will never be stable unless there

70 is pollen limitation. We stress that this single-locus model does not account for the feedback  
71 between plant and pollinator populations that is inherent to the mutualism. As an alternative,  
72 consumer-resource models (e.g., Holland and DeAngelis, 2010) allow us to ask how pollinators  
73 can influence the evolution of selfing by explicitly connecting plant and pollinator dynamics  
74 (e.g., Lepers, *et al.*, 2014).

75         The economics of participating in the mutualism could also play a pivotal role in the  
76 evolution of selfing. Specifically, plants pay a price for pollinator services through floral  
77 attraction and rewards. Empirical studies of floral construction and maintenance costs of highly  
78 outcrossing flowers indicate that they can be substantial (Schemske, 1978; Waller, 1979),  
79 comprising a large fraction of a plant's carbon budget and exacting tolls via transpiration and  
80 respiration (Nobel, 1977; Ashman and Baker, 1992; Ashman and Schoen, 1997; Ashman and  
81 Schoen, 1994; Galen, 1999; Teixido and Valladares, 2014). Although floral investment costs are  
82 not often considered in models of mating system evolution (but see Sakai, 1995 and Lepers, *et*  
83 *al.*, 2014), the potential for links between investment in attractiveness and the mating system is  
84 clear. Attraction should be positively correlated both with investment costs and outcrossing.  
85 These associations tack on an additional cost of outcrossing and create a clear mechanism for  
86 pollen discounting. Unattractive individuals may escape pollinators and thus achieve high selfing  
87 even in the face of high pollinator abundance, but this comes at the expense of exporting pollen  
88 and siring outcross offspring. Given these links, the question about the evolution of complete  
89 selfing becomes one about whether reductions in investment costs could enable plants to not only  
90 realize higher selfing rates but also to recoup some or all of the costs paid through inbreeding  
91 depression and pollen discounting. Indeed, across angiosperms smaller flowers are associated  
92 with higher rates of selfing ('selfing syndrome'; Sicard and Lenhard, 2011). Moreover, as the

93 population on average becomes less attractive and provides fewer rewards, pollinator densities  
94 could decline, which in turn would further select for increased selfing rates via reproductive  
95 assurance. We are aware of only one model that explicitly considered plant pollinator dynamics  
96 in concert with floral costs (Lepers, *et al.*, 2014), but it does not address pollen discounting.

97         In this study, we present consumer-resource models that consider plant and pollinator  
98 densities, selfing rate, inbreeding depression, plant attractiveness to pollinators, and the cost of  
99 attraction (or unattractiveness) including pollen discounting to evaluate the conditions under  
100 which higher rates of selfing can evolve. In contrast to most models that begin with a population  
101 of outcrossers and evaluate invasion of partial selfers, we consider whether and how higher rates  
102 of selfing can evolve within a population that is already partially selfing (mixed mating). First,  
103 we ask under what general conditions can an unattractive, completely selfing mutant replace a  
104 resident population of partial selfers whose selfing rate is a continuous function of attractiveness  
105 (Model 1). Next, we explore conditions when a less attractive, potentially more highly selfing  
106 mutant can invade a resident population of partial selfers at equilibrium with their pollinator  
107 partner (Model 2). We highlight ecological conditions that may restrict the evolution of complete  
108 selfing and uncover conditions where complete selfing may still be expected to evolve.

109

## 110 **METHODS**

111         Our two models explore the relationship between pollinator dynamics and the relative  
112 success of an attractive resident vs. a less attractive invader with a higher effective selfing rate.  
113 Each of these models is based on a system of three ordinary differential equations (ODE),  
114 described below. All parameter definitions and default values are shown in Table 1. Explanations  
115 for these values can be found in Appendix A.

116 *Model 1: Complete vs. partial selfers*

117 Model 1 explores the dynamics of our system where an attractive partial-selfer ( $P$ )  
118 competes with an invader ( $S$ ) that exclusively reproduces through selfing. In this system, the  
119 animal pollinator ( $A$ ) only interacts with the partial selfer, although it can maintain a positive  
120 population size as a ‘generalist’ feeding on other flowers that are external to the two-species  
121 system.

122 The growth rate of the resident partial selfer’s population density,  $P$ , is given by equation  
123 1. The resident produces  $r$  ovules per individual per unit time, representing its maximum intrinsic  
124 growth rate. These ovules can either be fertilized through outcrossing or selfing, where  
125 outcrossing occurs according to the rate of interactions between plants and pollinators.  
126 Pollinators visit flowers according to their attractiveness,  $a_P$ , as a saturating function of plant and  
127 animal densities with a half-saturation constant  $h_1$ . Any ovules that are not fertilized through  
128 outcrossing are fertilized through delayed selfing (we assume no self-pollen limitation), with  
129 survival discounted by inbreeding depression,  $\delta$ . The resident plant experiences density  
130 dependent mortality according to the density of  $P$  and  $S$  individuals combined, which are  
131 assumed to be competing for common resources. The resident also experiences losses through  
132 the cost it pays to produce attractive flowers and nectar for pollinators, where cost is a saturating  
133 function of attractiveness,  $a_P$ , with a half saturation constant  $h_2$ , up to a maximum per capita cost  
134  $c$ . The cost of attraction as a single metric is supported by empirical evidence of positive  
135 correlations between flower size and reward in some systems (e.g., Stanton and Young, 1994;  
136 Campbell, 1996; Fenster *et al.*, 2006; Tavares, *et al.*, 2016).

137

138 
$$\frac{dP}{dt} = rP \left( \frac{a_P P A}{h_1 + P A} + (1 - \delta) \left( 1 - \frac{a_P P A}{h_1 + P A} \right) \right) - mP \left( 1 + \frac{P+S}{k} \right) - cP \left( \frac{a_P}{h_2 + a_P} \right) \quad (1)$$

139

140 The invading complete selfer population density,  $S$ , also produces  $r$  ovules per individual,  
141 and since all ovules are fertilized through selfing, successful fertilization is discounted by  
142 inbreeding depression,  $\delta$ . Because the selfer is completely unattractive to pollinators, there are no  
143 mating events between the complete selfers and the resident partial selfers. The invader  
144 experiences the same density-dependent mortality as the resident. Its growth rate is given as:

145

$$146 \quad \frac{dS}{dt} = rS(1 - \delta) - mS \left(1 + \frac{S+P}{k}\right) \quad (2)$$

147

148 The animal pollinator population density,  $A$ , grows based on its consumption of floral  
149 resources, represented by an intrinsic growth rate  $\rho$  that is independent of the resident plant  
150 density. The pollinator population can also benefit from feeding on the resident partial-selfer,  
151 where  $\beta$  is the maximal per-capita benefit and the actual benefit is a saturating function of plant  
152 density. The pollinator also experiences density-dependent mortality, with a maximum mortality  
153 rate of  $\mu$  scaled by a density-dependent factor  $K$ . Its growth rate is defined as:

154

$$155 \quad \frac{dA}{dt} = \rho A + \beta_P A \left(\frac{a_P P}{h_3 + P}\right) - \mu A \left(1 + \frac{A}{K}\right) \quad (3)$$

156

157 The model was run according to default parameter values shown in Table 1.

158

### 159 *Model 2: Invasion dynamics of a less attractive mutant*

160 Model 2 explores a case wherein a mutant genotype ( $M$ ) arises in a resident population of  
161 partial-selfing plants ( $P$ ) fertilized by a generalist animal pollinator ( $A$ ). The mutant genotype is



162 less attractive than the resident ( $a_M < a_P$ ) but is otherwise biologically identical. Because the  
 163 mutant arises from the resident population, it is initially very rare (one individual) and arises in a  
 164 resident population that is initially at equilibrium with its animal pollinator. Consistent with  
 165 previously validated phenotypic models (Cheptou, 2004; Lepers, *et al.*, 2014), we assume that  
 166 when outcrossing occurs between resident and mutant genotypes, 50% of the offspring exhibit  
 167 the resident phenotype, while 50% exhibit the mutant phenotype.

168 This model consists of an ODE with three equations, one for the resident partial-selfer  
 169 ( $P$ ), one for the less attractive mutant ( $M$ ), and one for the animal pollinator ( $A$ ).

170

$$\begin{aligned}
 171 \quad \frac{dP}{dt} = rP & \left( \left( \frac{a_P PA}{h_1 + [P + (a_M/a_P)M]A} + \frac{1}{2} \frac{a_M MA}{h_1 + [P + (a_M/a_P)M]A} \right) \right. \\
 172 & \left. + (1 - \delta) \left( 1 - \left( \frac{a_P PA}{h_1 + [P + (a_M/a_P)M]A} + \frac{a_M MA}{h_1 + [P + (a_M/a_P)M]A} \right) \right) \right) \\
 173 & + rM \left( \frac{1}{2} \frac{a_M PA}{h_1 + [P + (a_M/a_P)M]A} \right) - mP \left( 1 + \frac{M + P}{k} \right) - cP \left( \frac{a_P}{h_2 + a_P} \right) \\
 174 & \hspace{15em} (4)
 \end{aligned}$$

175

$$\begin{aligned}
 176 \quad \frac{dM}{dt} = rM & \left( \left( \frac{a_M MA}{h_1 + [P + (a_M/a_P)M]A} + \frac{1}{2} \frac{a_M PA}{h_1 + [P + (a_M/a_P)M]A} \right) \right. \\
 177 & \left. + (1 - \delta) \left( 1 - \left( \frac{a_M PA}{h_1 + [P + (a_M/a_P)M]A} + \frac{a_M MA}{h_1 + [P + (a_M/a_P)M]A} \right) \right) \right) \\
 178 & + rP \left( \frac{1}{2} \frac{a_M MA}{h_1 + [P + (a_M/a_P)M]A} \right) - mM \left( 1 + \frac{M + P}{k} \right) - cM \left( \frac{a_M}{h_2 + a_M} \right) \\
 179 & \hspace{15em} (5)
 \end{aligned}$$

$$\frac{dA}{dt} = \rho A + \beta_P A \left( \frac{a_P P}{h_3 + [P + (a_M/a_P)M]} \right) + \beta_M A \left( \frac{a_M M}{h_3 + [P + (a_M/a_P)M]} \right) - \mu A \left( 1 + \frac{A}{K} \right) \quad (6)$$

182

183 The resident partial selfer population density,  $P$ , grows according to the fraction of its total ovule

184 production ( $rP$ ) devoted to outcrossing with other residents, outcrossing with mutants, and

185 selfing (Eqn 4). Within the parentheses following  $rP$ , the first term indicates the fraction of

186 ovules fertilized by the pollinator with pollen from other plants with the resident genotype.

187 Outcrossing is a saturating functional response (half saturation constant  $h_1$ ) of plant and

188 pollinator densities, and depends upon the attractiveness,  $a_P$ , of the resident plant, with 100% of

189 these ovules result in an offspring with the resident phenotype. The second term indicates the

190 fraction of ovules fertilized by the pollinator with pollen from plants with the mutant genotype.

191 Again, outcrossing is a saturating functional response of plant and pollinator densities but

192 depends upon the attractiveness of the less-attractive mutant,  $a_M$ , such that when the mutant is

193 very unattractive, between-genotype outcrossing occurs at a low rate regardless of the

194 attractiveness of the resident,  $a_P$ . From these ovules, 50% of offspring exhibit the resident

195 phenotype, while 50% exhibit the mutant phenotype. The remaining term within the parentheses

196 following  $rP$  indicates the fraction of ovules produced by the resident that are not fertilized by

197 the pollinator, and therefore are fertilized through delayed selfing. Of these self-fertilized ovules,

198 a fraction  $(1-\delta)$  survives, accounting for mortality due to inbreeding depression,  $\delta$ . As with

199 Model 1, we assume no pollen limitation; all ovules not fertilized with outcrossed pollen are

200 fertilized with self-pollen. In the next model term,  $rM$  indicates total mutant ovule production,

201 and the term following  $rM$  indicates the fraction of these ovules fertilized through outcrossing

202 with resident plants that result in a resident phenotype. Finally, the resident plant experiences

203 losses through density dependent mortality according to a maximum mortality rate  $m$  and a  
204 density dependent term  $k$ . The resident also experiences a cost of pollination that is independent  
205 of pollinator density but increases as a function of attractiveness following three alternative cost  
206 functions (figure 1). In the first scenario the cost of pollination increases to a maximum cost  $c_P$   
207 at a saturating rate with attractiveness,  $a_P$ , based on a half-saturation constant  $h_2$  (shown in text).  
208 In the second, the cost of pollination increases linearly with attractiveness. In the third function,  
209 the cost of pollination increases at an accelerating rate as the plant becomes more attractive.

210 The less attractive mutant population density,  $M$ , grows according to an identically  
211 structured equation (Eqn 5), where the primary difference between species is that the mutant is  
212 less attractive than the resident ( $a_M < a_P$ ).

213 The animal pollinator population density,  $A$ , grows based on its consumption of the two  
214 plant genotypes as well as through external floral resources (Eqn 6). When the pollinator is a  
215 generalist, it feeds on external floral resources, represented by an intrinsic growth rate  $\rho$  that is  
216 independent of the resident and mutant genotype densities. The pollinator population density can  
217 also increase through feeding on the resident partial selfer and the mutant, where  $\beta_i$  is the  
218 maximal per-capita benefit and the actual benefit is a saturating function of genotype densities  
219 with a half-saturation constant  $h_3$ . The pollinator also experiences density-dependent mortality,  
220 with a maximum mortality rate of  $\mu$  scaled by a density-dependent factor  $K$ .

221 The model is written on the assumption that  $a_M \leq a_P$ , and therefore conditions where a  
222 mutant that is more attractive than the resident partial selfer never exist. This assumption plays  
223 into the model structure in the attractiveness terms, where the probability of outcrossing between  
224 genotypes depends on the attractiveness of the mutant rather than the resident. This assumption  
225 also influences the denominator of the pollination functional response, where pollinator satiation

226 based on mutant abundance is weighted by the relative attractiveness of the mutant. We note that  
227 where  $a_M = 0$  (i.e., where the attractiveness differential = 1), the mutant is a complete selfer and  
228 this model collapses to the case of Model 1.

### 229 *Model 2 Analysis*

230 We analyzed the model to determine under which conditions the mutant ( $M$ ) would meet  
231 the invasion criterion of exhibiting a positive population growth rate when rare when the resident  
232 partial selfer ( $P$ ) and the animal pollinator ( $A$ ) were at equilibrium. The two-equation system for  
233 the resident genotype and pollinator could not be solved analytically, so equilibrium densities  
234 were calculated through numerical simulations. Under each set of parameter values, the model  
235 was simulated for 5000-time steps in the software program *Mathematica*, using the ‘NDSolve’  
236 numerical integrator. This resulted in convergence on stable densities for both the resident  
237 genotype,  $P$ , and its animal pollinator,  $A$ , under all conditions presented here. After equilibrium  
238 densities were calculated for all relevant scenarios, initial mutant growth rate was calculated  
239 based on Eqn 5.

240 We note that Model 2 is written to apply when the mutant is rare and that the simple  
241 relationship between genotype and phenotype that we assumed here is unlikely to apply when the  
242 mutant is common. As such, in contrast to Model 1, we cannot view Model 2 as an equilibrium  
243 model. Instead, we analyze Model 2 based on the invasion criterion of the mutant exhibiting a  
244 positive population growth rate when rare and cannot speak to the outcome of the mutant  
245 invasion in the long-term.

246

## 247 **RESULTS**

248 *Model 1: Complete vs. partial selfer*

249 Model 1 examines the outcome when a partial selfer competes with a complete selfer.  
250 Strikingly, we find a large parameter space over which the complete selfer wins (figure 2), even  
251 in the face of complete pollen discounting. When the resident is highly attractive ( $a_P = 0.8$ ), the  
252 complete selfer can win at low inbreeding depression levels only ( $\delta < 0.25$ ). At such levels, the  
253 complete selfer fertilizes all ovules but pays neither the cost of making flowers nor a substantial  
254 cost of inbreeding. Therefore, it replaces the partial selfer, who pays a high cost of attractiveness.  
255 However, as inbreeding depression increases, the balance tips in favor of the partial selfer.  
256 Although the partial selfer still pays the same cost of making flowers, its high rate of outcrossing  
257 allows it to largely avoid the cost of inbreeding depression. The complete selfer, however, pays  
258 the cost of inbreeding depression on all progeny. The partial selfer can persist even when  
259 inbreeding depression is complete ( $\delta = 1$ ) because it maintains maximum levels of outcrossing  
260 when it is highly attractive (figure B1), though equilibrium density of the partial selfer declines  
261 with increasing inbreeding depression (figure 2 A).

262 As the attractiveness of the resident partial selfer decreases, the complete selfer wins at  
263 increasingly higher levels of inbreeding depression while the range over which the partial selfer  
264 can win becomes greatly restricted, instead going extinct. When the partial selfer is moderately  
265 attractive (e.g.,  $a_P = 0.5$ ), the dynamics for the complete selfer do not change drastically from the  
266 case of the highly attractive partial selfer (complete selfer now wins up to  $\delta \sim 0.3$ ), but the partial  
267 selfer only wins when inbreeding depression is between 0.3 and 0.6 and declines to extinction  
268 when  $\delta > 0.6$ . The moderate reduction in attractiveness has two key consequences for the partial  
269 selfer. First, under a saturating function this reduction in attractiveness barely reduces the cost of  
270 attractiveness compared to the case of  $a_P = 0.8$  (figure 1). Second, the partial selfer now has a  
271 higher selfing rate and so incurs a higher cost of inbreeding for a larger proportion of seeds. This

272 combination represents the worst of both worlds associated with mixed mating, resulting in  
273 greater net losses for the partial selfer. Consequently, the pure selfer wins at marginally greater  
274 inbreeding depression values because it still pays no cost of attraction, and the partial selfer  
275 occurs at a lower density even where it wins (figure 2 *A* vs 2 *B*). At even lower levels of  
276 attractiveness (e.g.,  $a_P = 0.2$ ), the partial selfer fares even worse because it now self-fertilizes at a  
277 rate nearly identically to the complete selfer yet continues to pay some cost of attractiveness.  
278 This scenario tips the scale in favor of the complete selfer, such that the complete selfer wins up  
279 to the boundary value of  $\delta=0.5$ . After that point, neither type of selfer persists (Fig 2 *C*).

#### 280 *Model 2: Invasion dynamics of a less attractive mutant*

281 With Model 2, we fix the attractiveness level of a resident partial selfer and asked  
282 whether a less attractive mutant can invade when rare. The attractiveness of the mutant is defined  
283 relative to that of the resident in terms of an ‘attractiveness differential’. When the resident is  
284 highly attractive ( $a_P=0.8$ ) and the maximum cost of pollination is set at  $c=0.03$ , a saturating cost  
285 function means that initial decreases in the mutant’s attractiveness relative to a highly attractive  
286 resident—represented as low values of the attractiveness differential—do not appreciably  
287 decrease floral investment costs (figure 1). Yet the selfing rate still increases linearly (figure 1).  
288 This combination combined with inbreeding depression strongly restricts the ability of the  
289 mutant to invade, even at  $\delta<0.1$  (figure 3 *A*). Once the attractiveness differential reaches  $\sim 0.5$  or  
290 greater, however, the savings in investment costs for the mutant increases, and the benefits of  
291 reduced flower/reward costs begin to offset the cost of greater selfing at even higher inbreeding  
292 depression levels. This benefit is reflected in the rapidly growing region in which the mutant can  
293 invade as attractiveness differential continues to increase (figure 3 *A*). Even still, the mutant  
294 overall remains limited by inbreeding depression. Note that at an attractiveness differential of 1

295 ( $a_P=0.8$  and  $a_S=0$ ), results are identical to our first model for  $a_P=0.8$ , since the mutant is a  
296 complete selfer.

297       Compared to a saturating cost function, linear and exponential curves always result in a  
298 lower cost for a given level of attractiveness (figure 1) and so create more favorable conditions  
299 for a less attractive, more highly selfing mutant to invade when the resident is highly attractive  
300 (figure 3). Now, the mutant can invade over a greater combination of attractiveness differentials  
301 and inbreeding depression values than it can under a saturating curve. When the cost of attraction  
302 is an increasing linear of attractiveness, it is inversely related to the selfing rate. Consequently,  
303 any change in attractiveness (and thus cost of attraction) is balanced by a proportional change in  
304 selfing rate (and thus proportion of individuals paying the cost of inbreeding depression). This  
305 creates a critical threshold value of inbreeding depression; below this threshold the mutant can  
306 invade at any attractiveness differential (figure 3). As long as inbreeding depression is below this  
307 threshold, any losses the mutant pays from inbreeding depression will be outweighed by gains  
308 from the reduction in attraction costs, and the initial growth rate of the mutant is positive.

309       When instead the cost function is exponential, the mutant is more successful at invading  
310 at lower attractiveness differentials (figure 3). Under this cost function, small reductions in  
311 attraction relative to a highly attractive resident ( $a_P=0.8$ ) result in a dramatic decrease in costs  
312 that is disproportionate to the linear increase in selfing rate. Hence, the savings from reduced  
313 attractiveness offset the losses to inbreeding depression. With further decreases in attractiveness  
314 under an exponential function, however, the reduction in cost diminishes. Functionally, this  
315 leads to a slight retraction of the range of inbreeding depression values over which the mutant  
316 can invade as the attractiveness differential increases.

317 We find that the impact of altering the attractiveness of the resident depends on the shape  
318 of the cost function (figure 3 *B* vs. 3 *A*). When the resident is only moderately attractive ( $a_P=0.5$ ),  
319 the region over which the mutant can invade expands under a saturating cost curve, remains the  
320 same under a linear cost curve, and contracts under an exponential curve. Under a saturating  
321 curve, expansion arises when the resident starts out less attractive ( $a_P=0.5$ ) because the mutant's  
322 lower attractiveness finally begins to pay off in terms of cost savings (see figure 1). The reverse  
323 occurs under an exponential cost function at  $a_P=0.5$  because the reduction in attractiveness costs  
324 with the reduction in attractiveness begins to slow down, and difference in floral costs paid by  
325 the mutant at increasingly greater attractiveness differentials becomes minimal. In addition, a  
326 less attractive resident exhibits negative growth rates and goes extinct over a range of inbreeding  
327 depression values, with the threshold dictated by the cost curve (figure 3). As in Model 1, this  
328 consequence arises because moderate attractiveness results in the worst of both worlds scenario  
329 when inbreeding depression is high.

330 When we double the maximum cost of pollination to the resident ( $c=0.06$ ), the shape of the  
331 parameter space remains the same, but the size of the space in which the mutant can successfully  
332 invade doubles (figure 3). Under this scenario, the equilibrium density of the resident is lower  
333 compared to the case of  $c=0.03$ , making it easier for the mutant to have positive growth rates and  
334 successfully invade at higher inbreeding depression levels. Another key difference when the  
335 maximum pollination cost is greater is that the resident goes extinct over a larger range of  
336 parameter values. For a highly attractive resident ( $a_P=0.8$ ), we see this across all cost curves  
337 (compare top and bottom panels of figure 3 *A*), though inbreeding depression threshold above  
338 which the resident goes extinct varies across cost curves. When the resident is moderately  
339 attractive ( $a_P=0.5$ ), the level of inbreeding depression at which it goes extinct decreases slightly



340 under an exponential cost function, remains the same under a linear cost function, and drastically  
341 decreases under a saturating cost function such that extinction is predicted even when  $\delta < 0.5$ .

342

## 343 **Discussion**

344 With our model we considered whether the role of pollinator availability can cut both  
345 ways. That is, if a lack of pollinators can sustain mixed mating despite genetic conditions  
346 selecting against selfing, can the presence of pollinators also sustain mixed mating despite  
347 genetic conditions favoring greater selfing? If so, what are the conditions that define how and  
348 when selfing can evolve when pollinators are abundant? Our consumer-resource modeling  
349 approach reveals how the economics of floral investment, pollen discounting, and inbreeding  
350 depression interact to maintain mixed mating in species capable of autonomous selfing and finds  
351 limited circumstances under which greater selfing rates can evolve when pollinators are  
352 abundant.

### 353 *Pay to Play*

354 Despite inclusion of pollination biology in theoretical models of mating system evolution  
355 (reviewed in Goodwillie, Kalisz and Eckert, 2005), the cost of participating in the pollination  
356 mutualism by generalist-pollinated plants has largely been ignored (but see Lepers, Dufay and  
357 Billiard, 2014; Sakai, 1995). Most mutualisms, however, incur a cost (Bronstein, 2001),  
358 including generalist pollination systems (Morris, Vázquez and Chacoff, 2010). Key to remaining  
359 in the mutualism is whether the benefits provided outweigh such costs. For self-compatible plant  
360 species, the alternative to investing in pollinator attraction is to fail to attract pollinators, self-  
361 fertilize, and pay the potentially greater toll inflicted by inbreeding depression. Thus, to outcross,  
362 plants must pay to play. When the cost of attraction enters the mating-system evolution equation,

363 the situation becomes about whether reductions in investment costs enable plants to both realize  
364 higher selfing rates and recoup the costs paid through inbreeding depression. Not surprisingly  
365 then, we find that increasing maximum floral investment cost increases the parameter space over  
366 which more highly selfing individuals can invade.

367         Consideration of the level of attractiveness of the resident partial selfer and its interaction  
368 with the shape of the associated cost function leads to new and surprising results. In our first  
369 model considering a pure selfer and a saturating cost curve, for example, we show that it is more  
370 difficult for a complete selfer to win against a *more* attractive, partial selfer than a *less* attractive  
371 partial selfer. This result is somewhat counterintuitive, since the greater the attraction, the greater  
372 the floral costs paid by the partial selfer. But, attractive plants outcross and in doing so avoid  
373 paying the cost of inbreeding depression. For a completely attractive plant in Model 1, paying  
374 the cost of attraction alone is less expensive than the cost paid by a pure selfer in the currency of  
375 inbreeding depression, until inbreeding depression is low enough such that the balance is tipped  
376 in favor of the pure selfer ( $< 0.2$  based on the parameter values modeled here). In contrast, less  
377 attractive partial selfers begin paying the cost of inbreeding depression on top of floral costs,  
378 paving the way for pure selfers to win at increasingly greater levels of inbreeding depression.  
379 This result highlights the fact that mixed maters can get stuck paying double, and when the  
380 combined costs of inbreeding depression and attraction become too great, go extinct.  
381 Nevertheless, these dynamics create a parameter space over which mixed mating ( $0.2 < s < 0.8$ ) and  
382 even outcrossing ( $s < 0.2$ ) can win against a pure selfer when  $ID < 0.5$ .

383         When we consider different cost functions and investigate conditions under which higher  
384 selfing rates may evolve via the invasion of a less attractive mutant, we find that the shape of the  
385 cost function can drive mating system evolution and the potential for the stability of mixed

386 mating. In general, the evolution of selfing is more permissive under linear and exponential cost  
387 functions than under a saturating one. However, we reveal an interaction between the resident's  
388 attractiveness and the shape of the cost function: as the attractiveness of the resident increases,  
389 the evolution of higher selfing rates becomes more permissive under an exponential cost function  
390 but less permissive when the cost curve is saturating. Although there exist limited cost estimates  
391 related to floral construction or maintenance (e.g., Oakley, Moriuchi and Winn, 2007; Ashman  
392 and Schoen, 1994; Ashman and Schoen, 1997; Galen, 1999), the shape of the cost function is not  
393 known for any species. Our model results suggest that variation among species in cost functions,  
394 due to differences in factors such as reward type, flower size and floral longevity, could drive  
395 variation in the conditions necessary for higher selfing rates to evolve.

396 Our approach complements and extends the work by Lepers et al. (2014). They too  
397 emphasized the co-evolution of mating system and floral traits and showed how, in some cases,  
398 pollinators may interfere with the evolution of selfing. However, there are important differences  
399 between the studies. First, Lepers et al. (2014) considered a broader set of conditions including a  
400 gradient of pollinator specialization. When the mutualism is highly specialized, plant and  
401 pollinator densities are tightly coupled, which can feed back to create simultaneous mate and  
402 pollinator limitation and favor selfing. In this way, Lepers et al. (2014) more fully take advantage  
403 of consumer-resource dynamic feedbacks. However, we restricted our analysis to the case of the  
404 more common generalized pollinator (Waser *et al.*, 1996; Ollerton, 1996; Thomson, 2003)  
405 because our goal was to explore whether and how selfing could arise without pollinator  
406 limitation. Second, and to that end, although both studies consider autonomous selfing, we  
407 elected to model delayed selfing, while Lepers et al. (2014) modeled prior selfing (*sensu* Lloyd,  
408 1979). Prior selfing could provide another avenue by which plants may be able to evolve selfing

409 in the presence of pollinators (Brys, *et al.*, 2016; Randle, *et al.*, 2018; Spigler and Kalisz, 2017)  
410 as could reduced herkogamy, but our emphasis on delayed selfing further allows for the  
411 elimination of pollen limitation as plants compensate for reductions in outcross pollen receipt  
412 (i.e. reproductive assurance). In addition, because the correlation between selfing rate and  
413 attractiveness in our model arises from pollinator behavior and not underlying genetic  
414 architecture, we create a scenario where pollinators enforce outcrossing, flipping the sign of the  
415 interaction to negative for the plant when inbreeding depression is low. Delayed selfing with low  
416 inbreeding depression might not be that uncommon (Goodwillie and Weber, 2018). Finally, the  
417 model of Lepers *et al.* (2014) is free from pollen discounting, the reduction in pollen export with  
418 increased self-pollination, a potentially critical parameter shaping mating system evolution  
419 (Nagylaki, 1976; Charlesworth, 1980; Holsinger, Feldman and Christiansen, 1984; Johnston *et*  
420 *al.*, 2009), whereas it an essential component in ours. Ultimately, while our model may represent  
421 a more limited case, we are uniquely able to account for the presence of mixed-mating species  
422 with low inbreeding depression (Winn *et al.*, 2011).

#### 423 *Pollen discounting*

424 In our models, both the resident and less attractive mutant can experience pollen  
425 discounting as a function of their attractiveness. Unattractive flowers self-pollinate more because  
426 they receive fewer pollinator visits; yet because they do not receive as many visits they also  
427 export less. In modeling this connection, we gain another novel outcome: even with pollen  
428 discounting and abundant pollinators, the evolution of complete selfing is possible. This occurs  
429 because less attractive, more highly selfing individuals are able to recoup or even overcome the  
430 costs of inbreeding depression and pollen discounting through reduced floral expenses. Pollen  
431 discounting in our model is independent of the cost of attractiveness, but an emergent property is

432 that the severity of pollen discounting increases non-linearly with inbreeding depression (figure  
433 B2). This is because as inbreeding depression increases, the *gains* to the mutant via selfing  
434 decrease by a constant percentage while siring *gains* remain the same. This could also be  
435 explained by density since resident density declines linearly with inbreeding depression (figure  
436 B3). We see that selfing *rate* is impacted neither by inbreeding depression nor density of the  
437 resident, but siring *rate* increases in proportion to density with higher rates of inbreeding  
438 depression. We cannot say the degree to which pollen discounting and the change in its severity  
439 with inbreeding depression (or density) influences our results relative the influence of the cost of  
440 attractiveness. In particular, because the mutant is so rare, its highest siring rate is  $<1\%$  of  
441 resident ovules when resident density  $> 0$ . Nevertheless, these patterns highlight the importance  
442 of considering the links between pollinator visitation, plant density, inbreeding depression, and  
443 pollen discounting and suggests that selfers could pay an even higher cost of selfing when  
444 inbreeding depression is high. Future modeling efforts will explicitly account for the role of  
445 pollen discounting and its context dependency.

#### 446 *Caveats*

447 Several features of our model and assumptions may limit its generality. Although  
448 consumer-resource dynamic modeling can expand our understanding of the roles that  
449 demography and ecological interactions have in mating system evolution, they are inherently  
450 phenotypic, demographic models, not genetic models. Therefore, we can only count ovules  
451 produced and cannot properly account for the transmission advantage, nor how it may change as  
452 the frequency of selfing increases in the population (Holsinger, 1991). In addition, we note that  
453 inbreeding depression stays constant within our model. Inbreeding depression may evolve  
454 alongside the selfing rate and so influence the outcome of mating system evolution (Lande and

455 Schemske, 1985; Charlesworth and Charlesworth, 1987; Charlesworth and Charlesworth, 1990;  
456 Charlesworth, *et al.*, 1990; Husband and Schemske, 1996; but see Lande, *et al.*, 1994 and Winn  
457 *et al.*, 2011). However, because our study is primarily concerned with initial invasion conditions  
458 over relatively short ecological time periods, the assumption of equivalent inbreeding depression  
459 levels between the mutant and resident is reasonable. Inclusion of additional parameters or  
460 correlations such as those between flower size and ovule number or flower size and number (e.g.,  
461 Worley and Barrett, 2000; Worley and Barrett, 2001; Caruso, 2004; Delph *et al.*, 2004; Spigler  
462 and Woodard, 2019) would undoubtedly influence our outcomes. Further, pollinator-mediated  
463 selfing is influenced by floral display size and flower size and can lead to pollen discounting  
464 (Harder and Barrett, 1995) but is not considered here. Finally, we assumed that all genotypes are  
465 equally capable of autonomous selfing, such that selfing ability, per se, and floral attraction (such  
466 as flower size) vary independently. Future models can investigate variation in both attraction and  
467 selfing ability to examine their joint evolution and outcomes for the evolution of selfing and the  
468 selfing syndrome.

#### 469 *Evolutionary implications*

470 Our model provides an alternative hypothesis for the origin of the selfing syndrome. We  
471 consider: what if small flower size is what allows plants to achieve higher selfing rates to begin  
472 with? That is, if pollinators are abundant and enforce outcrossing, then high rates of selfing can  
473 only be achieved if flowers are unattractive. Our results illustrate how pure selfers only have an  
474 advantage if their floral investment is sufficiently reduced. We recognize that because we are  
475 modeling a case without pollen limitation, where individuals are already capable of autonomous  
476 selfing, that this scenario may be applicable under a restrictive set of cases. Nevertheless, it

477 provides an alternative pathway to the common association between flower size and mating  
478 system in angiosperms (Sicard and Lenhard, 2011).

479 Our models also lead to predictions about the success of mutations with varying effect  
480 sizes. Understanding the genetic basis of adaptation and the distribution of underlying effect  
481 sizes represents active areas of theoretical and empirical research (Yeaman and Whitlock, 2011;  
482 Savolainen, *et al.*, 2013; Dittmar *et al.*, 2016). Studies of floral and mating system traits have  
483 found evidence for both alleles of large and small effects (Bradshaw *et al.*, 1995; Bernacchi and  
484 Tanksley, 1997; Fishman, *et al.*, 2002; Goodwillie, *et al.*, 2006; Slotte *et al.*, 2012; Ferris *et al.*,  
485 2017). Our models investigating the invasion of a more highly selfing mutant suggest that the  
486 success of large vs. small effect alleles is highly context dependent, determined by the shape of  
487 the cost function, maximum floral cost, attractiveness of the resident, and inbreeding depression.  
488 Under a saturating cost function, a mutation of large effect, creating a large attractiveness  
489 differential between the resident and mutant, will be successful at invading over a wider range of  
490 inbreeding depression values and may allow for a more rapid evolutionary shift to higher selfing.  
491 In contrast, invasion success of alleles of small effect is highly restricted to only the lowest  
492 inbreeding depression levels. Lower maximum floral costs also translate into the need for a much  
493 larger effect mutation for higher selfing to evolve for a given inbreeding depression level under a  
494 saturating curve. For example, under conditions of  $\delta = 0.25$  and  $a_p=0.5$  (figure 3 B), we find that  
495 a more highly selfing mutant can successfully invade when  $c=0.06$  so long as the mutation(s)  
496 results in  $>50\%$  reduction in attraction relative to the resident. But, when  $c=0.03$  only a mutation  
497 resulting in a  $> 90\%$  reduction—near complete selfing—would be successful. A similar effect  
498 occurs when we hold the maximum floral cost and inbreeding depression constant for a  
499 saturating curve but alter the attractiveness of the resident; the threshold for a small effect

500 mutation to invade is much lower when the resident is less attractive. For a linear cost function,  
501 alleles of all effect sizes are equally as likely to invade provided inbreeding depression is lower  
502 than a threshold value. Finally, comparing across cost functions, small effect mutations, are more  
503 successful at invading over a wider range of inbreeding depression values under an accelerating  
504 or linear curve than under a saturating one.

505         In conclusion, our models illustrate how pollinators can interfere with mating system  
506 evolution, even when the genetic conditions are expected to pave the way for the evolution of  
507 complete selfing. By linking attractiveness to the selfing rate, we further provide a mechanism by  
508 which pollen discounting can occur with autonomous selfing and consider attractiveness as a  
509 cost of outcrossing. In this way, complete selfing can evolve in the face of pollen discounting so  
510 long as there is a cost to attraction, but it is still restrictive. The economics of floral investment  
511 are not traditionally viewed as a cost to outcrossing, creating a disconnect between models of  
512 mating system evolution and floral evolution. Our model illustrates the importance of  
513 understanding cost functions for attraction and reward to pollinators, and sets the stage for future  
514 models melding ecological, genetic and resource costs to explore conditions that permit or  
515 restrict the evolution of pure selfing.

516

517



518 **Literature Cited**

- 519 Ashman, T.-L., & Baker, I. (1992). Variation in floral sex allocation with time of season and  
520 currency. *Ecology*, 73(4), 1237-1243.
- 521 Ashman, T.-L., & Schoen, D. J. (1994). How long should flowers live? *Nature*, 371, 788-791.
- 522 Ashman, T.-L., & Schoen, D. J. (1997). The cost of floral longevity in *Clarkia tembloriensis*: An  
523 experimental investigation. *Evolutionary Ecology*, 11(3), 289-300.  
524 doi:10.1023/A:1018416403530
- 525 Bernacchi, D., & Tanksley, S. D. (1997). An interspecific backcross of *Lycopersicon esculentum*  
526 × *L. hirsutum*: linkage analysis and a QTL study of sexual compatibility factors and floral  
527 traits. *Genetics*, 147(2), 861-877.
- 528 Bradshaw, H. D., Wilbert, S. M., Otto, K. G., & Schemske, D. W. (1995). Genetic mapping of  
529 floral traits associated with reproductive isolation in monkeyflowers (*Mimulus*). *Nature*,  
530 376(6543), 762-765.
- 531 Bronstein, J. L. (2001). The costs of mutualism. *American Zoologist*, 41(4), 825-839.
- 532 Brys, R., van Cauwenberghe, J., & Jacquemyn, H. (2016). The importance of autonomous  
533 selfing in preventing hybridization in three closely related plant species. *Journal of*  
534 *Ecology*, 104(2), 601-610. doi:10.1111/1365-2745.12524
- 535 Burd, M. (2016). Pollen Limitation Is Common—Should It Be? (A Comment on Rosenheim et  
536 al., “Parental Optimism versus Parental Pessimism in Plants: How Common Should We  
537 Expect Pollen Limitation to Be?”). *The American Naturalist*, 187(3), 388-396.
- 538 Busch, J. W., & Delph, L. F. (2012). The relative importance of reproductive assurance and  
539 automatic selection as hypotheses for the evolution of self-fertilization. *Annals of botany*,  
540 109(3), 553-562.

- 541 Campbell, D. R. (1996). Evolution of floral traits in a hermaphroditic plant: field measurements  
542 of heritabilities and genetic correlations. *Evolution*, 50(4), 1442-1453.
- 543 Caruso, C. M. (2004). The quantitative genetics of floral trait variation in *Lobelia*: potential  
544 constraints on adaptive evolution. *Evolution*, 58(4), 732-740.
- 545 Charlesworth, B. (1980). The cost of sex in relation to mating system. *Journal of Theoretical*  
546 *Biology*, 84(4), 655-671. doi:10.1016/S0022-5193(80)80026-9
- 547 Charlesworth, D., & Charlesworth, B. (1987). Inbreeding depression and its evolutionary  
548 consequences. *Annual Review of Ecology and Systematics*, 18(1), 237-268.
- 549 Charlesworth, D., & Charlesworth, B. (1990). Inbreeding depression with heterozygote  
550 advantage and its effect on selection for modifiers changing the outcrossing rate.  
551 *Evolution*, 44(4), 870-888. doi:10.1111/j.1558-5646.1990.tb03811.x
- 552 Charlesworth, D., Morgan, M. T., & Charlesworth, B. (1990). Inbreeding depression, genetic  
553 load, and the evolution of outcrossing rates in a multilocus system with no linkage.  
554 *Evolution*, 44(6), 1469-1489. doi:10.1111/j.1558-5646.1990.tb03839.x
- 555 Cheptou, P. O. (2004). Allee effect and self-fertilization in hermaphrodites: reproductive  
556 assurance in demographically stable populations. *Evolution*, 58(12), 2613-2621.  
557 doi:10.1111/j.1558-5646.2008.00464.x
- 558 Delph, L. F., Gehring, J. L., Frey, F. M., Arntz, A. M., & Levri, M. (2004). Genetic constraints  
559 on floral evolution in a sexually dimorphic plant revealed by artificial selection.  
560 *Evolution*, 58(9), 1936-1946. doi:10.1111/j.0014-3820.2004.tb00481.x
- 561 Devaux, C., Lepers, C., & Porcher, E. (2014). Constraints imposed by pollinator behaviour on  
562 the ecology and evolution of plant mating systems. *Journal of Evolutionary Biology*,  
563 27(7), 1413-1430.

- 564 Dittmar, E. L., Oakley, C. G., Conner, J. K., Gould, B. A., & Schemske, D. W. (2016). Factors  
565 influencing the effect size distribution of adaptive substitutions. *Proceedings of the Royal*  
566 *Society B: Biological Sciences*, 283(1828), 20153065-20153065.  
567 doi:10.1098/rspb.2015.3065
- 568 Eckert, C. G., Samis, K. E., & Dart, S. (2006). Reproductive assurance and the evolution of  
569 uniparental reproduction in flowering plants. In H. LD & B. SCH (Eds.), *Ecology and*  
570 *evolution of flowers* (pp. 183-203). Oxford: Oxford University Press Oxford.
- 571 Fenster, C. B., Cheely, G., Dudash, M. R., & Reynolds, R. J. (2006). Nectar reward and  
572 advertisement in hummingbird-pollinated *Silene virginica* (Caryophyllaceae). *American*  
573 *Journal of Botany*, 93(12), 1800-1807.
- 574 Ferris, K. G., Barnett, L. L., Blackman, B. K., & Willis, J. H. (2017). The genetic architecture of  
575 local adaptation and reproductive isolation in sympatry within the *Mimulus guttatus*  
576 species complex. *Molecular Ecology*, 26(1), 208-224.
- 577 Fisher, R. A. (1941). Average excess and average effect of a gene substitution. *Annals of*  
578 *Eugenics*, 11(1), 53-63. doi:10.1111/j.1469-1809.1941.tb02272.x
- 579 Fishman, L., Kelly, A. J., & Willis, J. H. (2002). Minor quantitative trait loci underlie floral traits  
580 associated with mating system divergence in mimulus. *Evolution*, 56(11), 2138-2155.  
581 doi:10.1111/j.0014-3820.2002.tb00139.x
- 582 Galen, C. (1999). Why do flowers vary? The functional ecology of variation in flower size and  
583 form within natural plant populations. *Bioscience*, 49(8), 631-640.
- 584 Goodwillie, C., Kalisz, S., & Eckert, C. G. (2005). The evolutionary enigma of mixed mating  
585 systems in plants: occurrence, theoretical explanations, and empirical evidence. *Annual*  
586 *Review of Ecology and Systematics*, 36, 47-79.

- 587 Goodwillie, C., Ritland, C., & Ritland, K. (2006). The genetic basis of floral traits associated  
588 with mating system evolution in *Leptosiphon* (polemoniaceae): an analysis of  
589 quantitative trait loci. *Evolution*, *60*(3), 491-504. doi:10.1111/j.0014-  
590 3820.2006.tb01131.x
- 591 Goodwillie, C., & Weber, J. J. (2018). The best of both worlds? A review of delayed selfing in  
592 flowering plants. *American Journal of Botany*, *105*(4), 641-655. doi:10.1002/ajb2.1045
- 593 Harder, L. D., & Barrett, S. C. H. (1995). Mating cost of large floral displays in hermaphrodite  
594 plants. *Nature*, *373*(6514), 512-515.
- 595 Holland, J. N., & DeAngelis, D. L. (2010). A consumer–resource approach to the density-  
596 dependent population dynamics of mutualism. *Ecology*, *91*(5), 1286-1295.
- 597 Holsinger, K. E. (1991). Mass-action models of plant mating systems: the evolutionary stability  
598 of mixed mating systems. *The American Naturalist*, *138*(3), 606-622.
- 599 Holsinger, K. E., Feldman, M. W., & Christiansen, F. B. (1984). The evolution of self-  
600 fertilization in plants: a population genetic model. *The American Naturalist*, *124*(3), 446-  
601 453.
- 602 Husband, B. C., & Schemske, D. W. (1996). Evolution of the magnitude and timing of  
603 inbreeding depression in plants. *Evolution*, *50*(1), 54-70. doi:10.1111/j.1558-  
604 5646.1996.tb04472.x
- 605 Jarne, P., & Charlesworth, D. (1993). The evolution of the selfing rate in functionally  
606 hermaphrodite plants and animals. *Annual Review of Ecology and Systematics*, *24*(1),  
607 441-466.
- 608 Johnston, M. O., Porcher, E., Cheptou, P. O., Eckert, C. G., Elle, E., Geber, M. A., Kalisz S.,  
609 Kelly, J. K., Moeller, D. A., Vallejo-Marín, M., and Winn, A. A. (2009) Correlations among

- 610 fertility components can maintain mixed mating in plants. *American Naturalist*, 173(1),  
611 1-11. doi:10.1086/593705
- 612 Kalisz, S., Vogler, D. W., & Hanley, K. M. (2004). Context-dependent autonomous self-  
613 fertilization yields reproductive assurance and mixed mating. *Nature*, 430(7002), 884-  
614 887.
- 615 Knight, T. M., Steets, J. A., Vamosi, J. C., Mazer, S. J., Burd, M., Campbell, D. R., ... &  
616 Ashman, T. L. (2005). Pollen limitation of plant reproduction: pattern and process.  
617 *Annual Review of Ecology, Evolution, & Systematics*, 36, 467-497.
- 618 Lande, R., & Schemske, D. W. (1985). The evolution of self-fertilization and inbreeding  
619 depression in plants. I. Genetic models. *Evolution*, 39(1), 24-40.
- 620 Lande, R., Schemske, D. W., & Schultz, S. T. (1994). High inbreeding depression, selective  
621 interference among loci, and the threshold selfing rate for purging recessive lethal  
622 mutations. *Evolution*, 48(4), 965-978. doi:10.1111/j.1558-5646.1994.tb05286.x
- 623 Lepers, C., Dufay, M., & Billiard, S. (2014). How does pollination mutualism affect the  
624 evolution of prior self-fertilization? A model. *Evolution*, 68(12), 3581-3598.
- 625 Lloyd, D. G. (1979). Some reproductive factors affecting the selection of self-fertilization in  
626 plants. *The American Naturalist*, 113(1), 67-79.
- 627 Lloyd, D. G. (1992). Self-and cross-fertilization in plants. II. The selection of self-fertilization.  
628 *International journal of plant sciences*, 153(3, Part 1), 370-380.
- 629 Morris, W. F., Vázquez, D. P., & Chacoff, N. P. (2010). Benefit and cost curves for typical  
630 pollination mutualisms. *Ecology*, 91(5), 1276-1285. doi:10.1890/08-2278.1
- 631 Nagylaki, T. (1976). A model for the evolution of self-fertilization and vegetative reproduction.  
632 *Journal of Theoretical Biology*, 58(1), 55-58.

- 633 Nobel, P. S. (1977). Water relations of flowering of *Agave deserti*. *Botanical Gazette*, 138(1), 1-  
634 6.
- 635 Oakley, C. G., Moriuchi, K. S., & Winn, A. A. (2007). The maintenance of outcrossing in  
636 predominantly selfing species: ideas and evidence from cleistogamous species. *Annual*  
637 *Review of Ecology, Evolution, and Systematics*, 38(1), 437-457.  
638 doi:10.1146/annurev.ecolsys.38.091206.095654
- 639 Ollerton, J. (1996). Reconciling ecological processes with phylogenetic patterns: the apparent  
640 paradox of plant--pollinator Systems. *Journal of Ecology*, 84(5), 767-769.  
641 doi:10.2307/2261338
- 642 Randle, A. M., Spigler, R. B., & Kalisz, S. (2018). Shifts to earlier selfing in sympatry may  
643 reduce costs of pollinator sharing. *Evolution*, 72(8), 1587-1599. doi:10.1111/evo.13522
- 644 Rosenheim, J. A., Williams, N. M., & Schreiber, S. J. (2014). Parental optimism versus parental  
645 pessimism in plants: how common should we expect pollen limitation to be? *The*  
646 *American Naturalist*, 184(1), 75-90.
- 647 Rosenheim, J. A., Williams, N. M., Schreiber, S. J., & Rapp, J. M. (2016). Modest pollen  
648 limitation of lifetime seed production is in good agreement with modest uncertainty in  
649 whole-plant pollen receipt:(A reply to Burd). *The American Naturalist*, 187(3), 397-404.
- 650 Sakai, S. (1995). Optimal resource allocation to vegetative and sexual reproduction of a plant  
651 growing in a spatially varying environment. *Journal of Theoretical Biology*, 175(3), 271-  
652 282.
- 653 Savolainen, O., Lascoux, M., & Merilä, J. (2013). Ecological genomics of local adaptation.  
654 *Nature Reviews Genetics*, 14(11), 807-820. doi:10.1038/nrg3522

- 655 Schemske, D. W. (1978). Evolution of reproductive characteristics in Impatiens  
656 (Balsaminaceae): the significance of cleistogamy and chasmogamy. *Ecology*, 59(3), 596-  
657 613.
- 658 Schemske, D. W., & Lande, R. (1985). The evolution of self-fertilization and inbreeding  
659 depression in plants. II. Empirical observations. *Evolution*, 39(1), 41-52.
- 660 Sicard, A., & Lenhard, M. (2011). The selfing syndrome: a model for studying the genetic and  
661 evolutionary basis of morphological adaptation in plants. *Annals of Botany*, 107(9), 1433-  
662 1443.
- 663 Slotte, T., Hazzouri, K. M., Stern, D., Andolfatto, P., & Wright, S. I. (2012). Genetic architecture  
664 and adaptive significance of the selfing syndrome in *Capsella*. *Evolution*, 66(5), 1360-  
665 1374. doi:10.1111/j.1558-5646.2011.01540.x
- 666 Spigler, R. B., & Kalisz, S. (2017). Persistent pollinators and the evolution of complete selfing.  
667 *American Journal of Botany*, 104(12), 1783-1786.
- 668 Spigler, R. B., & Woodard, A. J. (2019). Context-dependency of resource allocation trade-offs  
669 highlights constraints to the evolution of floral longevity in a monocarpic herb. *New*  
670 *Phytologist*, 221(4), 2298-2307. doi:10.1111/nph.15498
- 671 Stanton, M., & Young, H. J. (1994). Selecting for floral character associations in wild radish,  
672 *Raphanus sativus* L. *Journal of Evolutionary Biology*, 7(3), 271-285. doi:10.1046/j.1420-  
673 9101.1994.7030271.x
- 674 Stebbins, G. L. (1974). *Flowering plants: evolution above the species level*. Cambridge, MA:  
675 Belknap Press.

- 676 Tavares, D. C., Freitas, L., & Gaglianone, M. C. (2016). Nectar volume is positively correlated  
677 with flower size in hummingbird-visited flowers in the Brazilian Atlantic Forest. *Journal*  
678 *of Tropical Ecology*, 32(4), 335-339.
- 679 Teixido, A. L., & Valladares, F. (2014). Disproportionate carbon and water maintenance costs of  
680 large corollas in hot Mediterranean ecosystems. *Perspectives in Plant Ecology, Evolution*  
681 *and Systematics*, 16(2), 83-92.
- 682 Thomson, J. (2003). When Is It Mutualism? (An American Society of Naturalists Presidential  
683 Address). *The American Naturalist*, 162(S4), S1-S9.
- 684 Waller, D. M. (1979). The Relative Costs of Self- and Cross-Fertilized Seeds in *Impatiens*  
685 *capensis* (Balsaminaceae). *American Journal of Botany*, 66(3), 313-320.  
686 doi:10.2307/2442608
- 687 Waser, N. M., Chittka, L., Price, M. V., Williams, N. M., & Ollerton, J. (1996). Generalization in  
688 pollination systems, and why it matters. *Ecology*, 77(4), 1043-1060.
- 689 Whitehead, M. R., Lanfear, R., Mitchell, R. J., & Karron, J. D. (2018). Plant mating systems  
690 often vary widely among populations. *Frontiers in Ecology and Evolution*, 6, 38.
- 691 Winn, A. A., Elle, E., Kalisz, S., Cheptou, P. O., Eckert, C. G., Goodwillie, C., . . . Vallejo-  
692 Marín, M. (2011). Analysis of inbreeding depression in mixed-mating plants provides  
693 evidence for selective interference and stable mixed mating. *Evolution*, 65(12), 3339-  
694 3359. doi:10.1111/j.1558-5646.2011.01462.x
- 695 Worley, A. C., & Barrett, S. C. H. (2000). Evolution of floral display in *Eichhornia paniculata*  
696 (Pontederiaceae): direct and correlated responses to selection on flower size and number.  
697 *Evolution*, 54(5), 1533-1545.



- 698 Worley, A. C., & Barrett, S. C. H. (2001). Evolution of floral display in *Eichhornia paniculata*  
699 (Pontederiaceae): genetic correlations between flower size and number. *Journal of*  
700 *Evolutionary Biology*, 14(3), 469-481. doi:10.1046/j.1420-9101.2001.00296.x
- 701 Yeaman, S., & Whitlock, M. C. (2011). The genetic architecture of adaptation under migration–  
702 selection balance. *Evolution*, 65(7), 1897-1911. doi:10.1111/j.1558-5646.2011.01269.x
- 703
- 704



706 **Figure Legends**

707 **Figure 1.** Cost and selfing rate as a function of attractiveness. We consider three cost function  
708 curves as shown (saturating, linear, accelerating) on the primary axis and indicated by the solid  
709 lines. Maximum cost value,  $c$ , is shown here as  $c = 0.03$ . Selfing rate decreases as a linear  
710 function of attractiveness, represented by the dotted line in reference to the secondary axis.

711  
712 **Figure 2.** Evolutionary outcome for the evolution of complete selfing depending on inbreeding  
713 depression ( $\delta$ ) and attractiveness of a resident partial selfer ( $a_p$ ) that depends on a generalist  
714 pollinator. The dark blue region indicates where the pure selfer dominates, and the yellow region  
715 indicates dominance of the partial selfer; neither morph persists in the aqua region. To better  
716 illustrate the underlying population dynamics, we show population sizes of the partial selfer,  
717 pure selfer, and pollinator as a function of inbreeding depression when (a)  $a_p = 0.8$ , (b)  $a_p = 0.5$ ,  
718 and (c)  $a_p = 0.2$ . We also show how population sizes of the partial selfer, pure selfer, and  
719 pollinator change over time when  $a_p = 0.5$  and (i)  $\delta = 0.2$ , (ii)  $\delta = 0.2$ , and (iii)  $\delta = 0.2$ .

720  
721 **Figure 3.** Pairwise invisibility plots for three different cost functions (saturating, linear,  
722 accelerating) and two maximum costs of attractiveness ( $c$ ). A. Resident is highly attractive ( $a_p =$   
723 0.8). B. Resident is less attractive ( $a_p = 0.5$ ). Four possible outcomes are represented according to  
724 the figure legend: the mutant can successfully invade (increases when rare), the mutant cannot  
725 invade (decreases when rare), density of the resident is 0 at demographic equilibrium, and  
726 density where the resident is 0 but the mutant can invade.

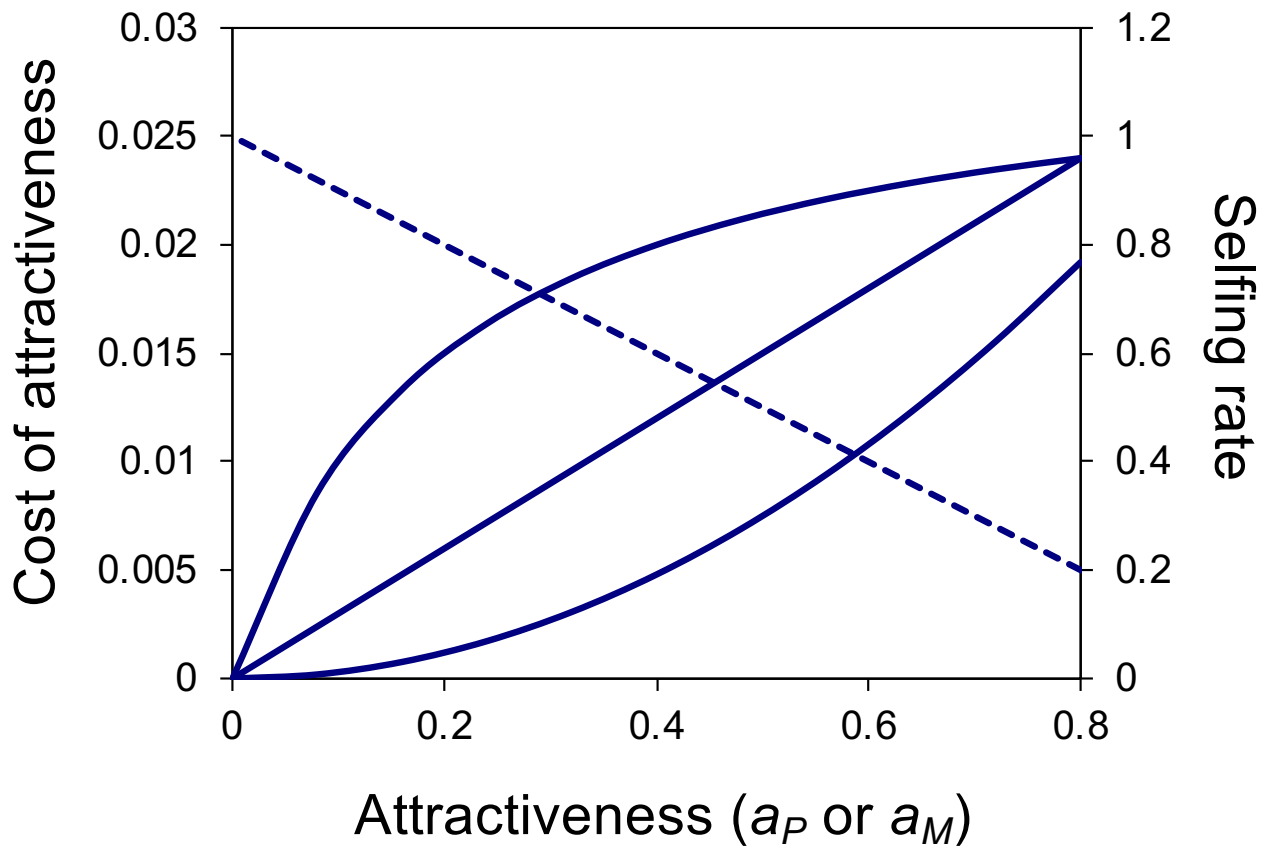

**Figure 1.** Cost and selfing rate as a function of attractiveness. We consider three cost function curves as shown (saturating, linear, accelerating) on the primary axis and indicated by the solid lines. Maximum cost value,  $c$ , is shown here as  $c = 0.03$ . Selfing rate decreases as a linear function of attractiveness, represented by the dotted line in reference to the secondary axis.

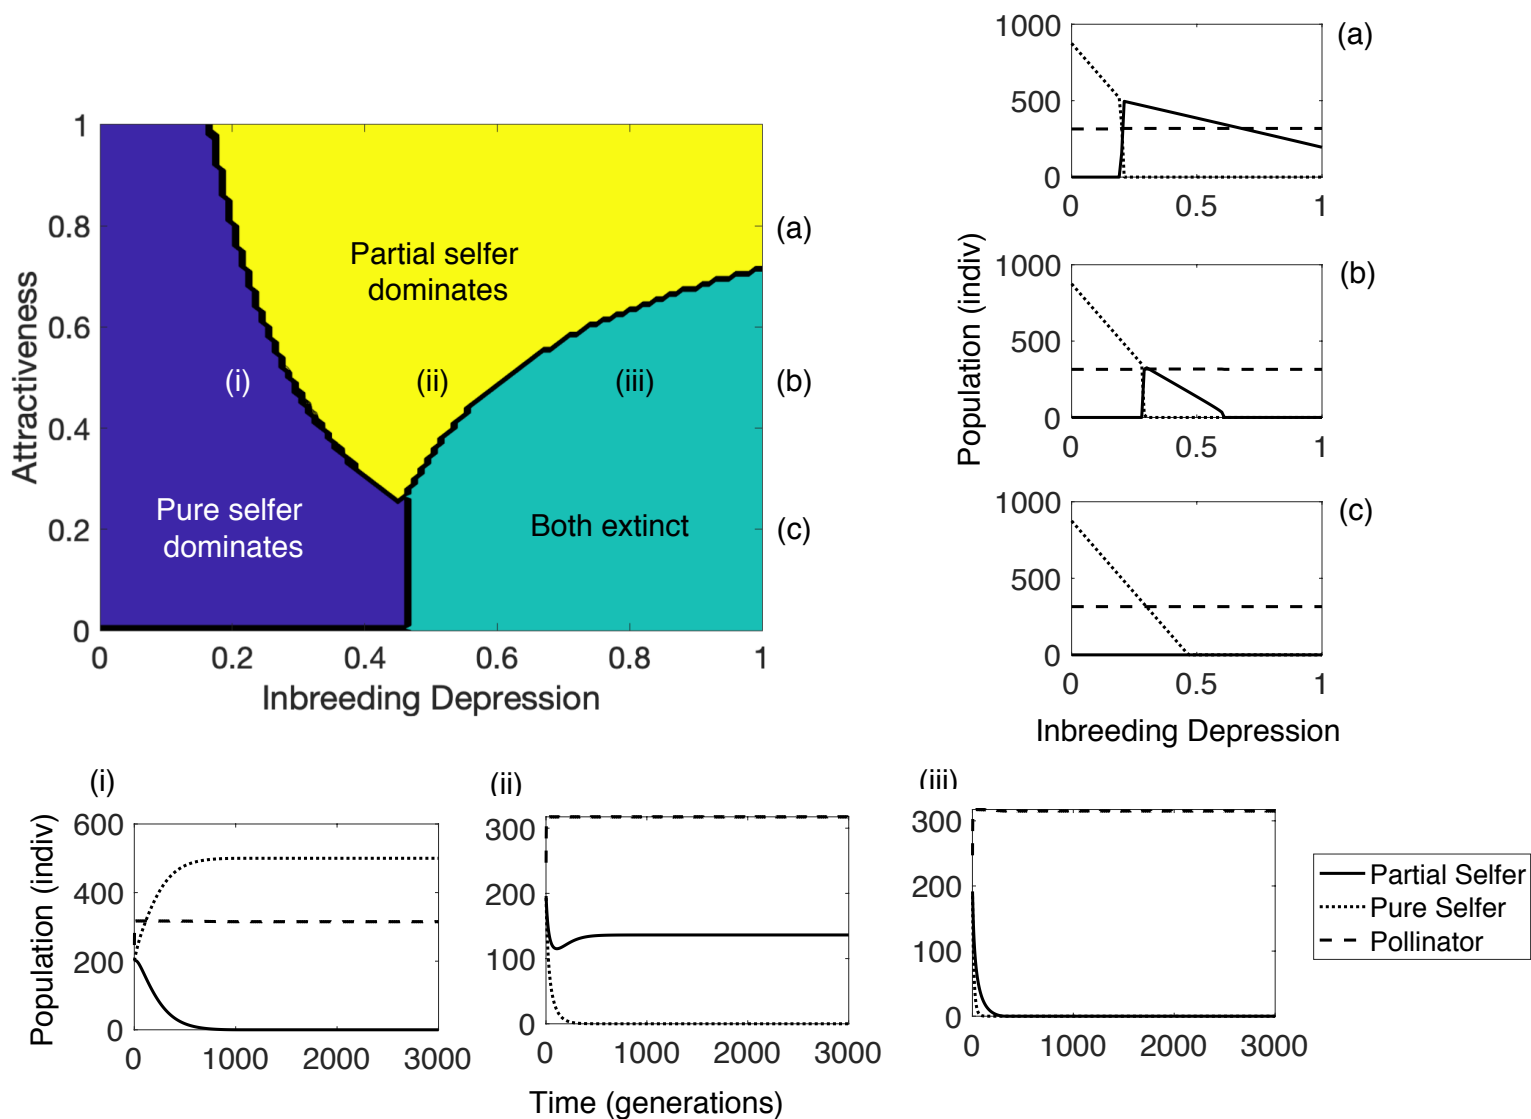

**Figure 2.** Evolutionary outcome for the evolution of complete selfing depending on inbreeding depression ( $\delta$ ) and attractiveness of a resident partial selfer ( $a_p$ ) that depends on a generalist pollinator. The dark blue region indicates where the pure selfer dominates, and the yellow region indicates dominance of the partial selfer; neither morph persists in the aqua region. To better illustrate the underlying population dynamics, we show population sizes of the partial selfer, pure selfer, and pollinator as a function of inbreeding depression when (a)  $a_p = 0.8$ , (b)  $a_p = 0.5$ , and (c)  $a_p = 0.2$ . We also show how population sizes of the partial selfer, pure selfer, and pollinator change over time when  $a_p = 0.5$  and (i)  $\delta = 0.2$ , (ii)  $\delta = 0.2$ , and (iii)  $\delta = 0.2$ .

### A. Resident highly attractive

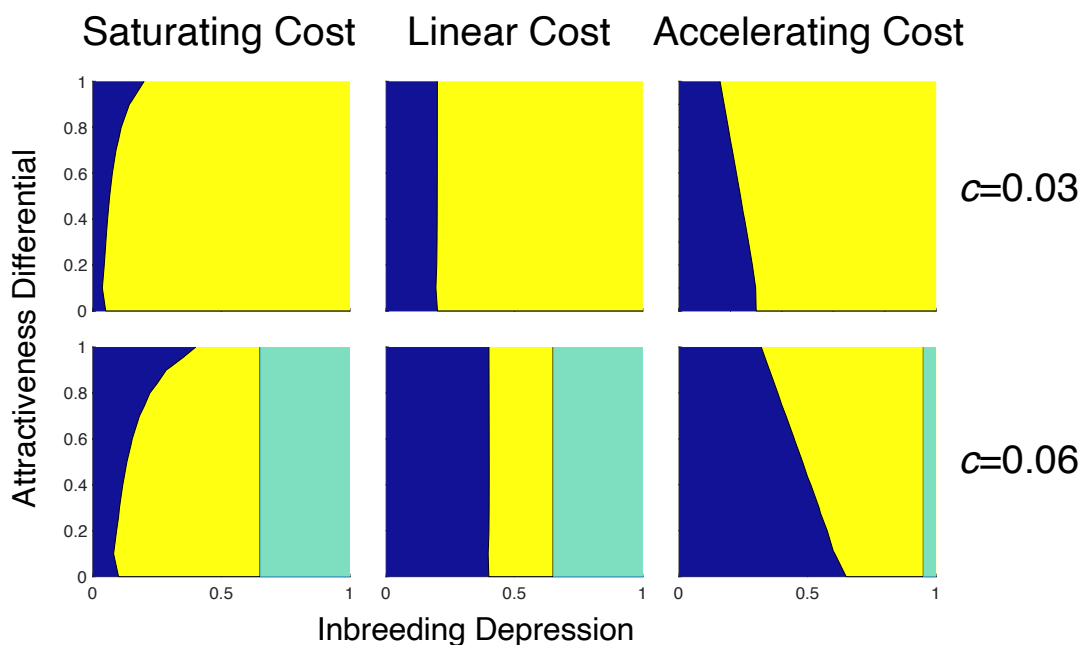

### B. Resident less attractive

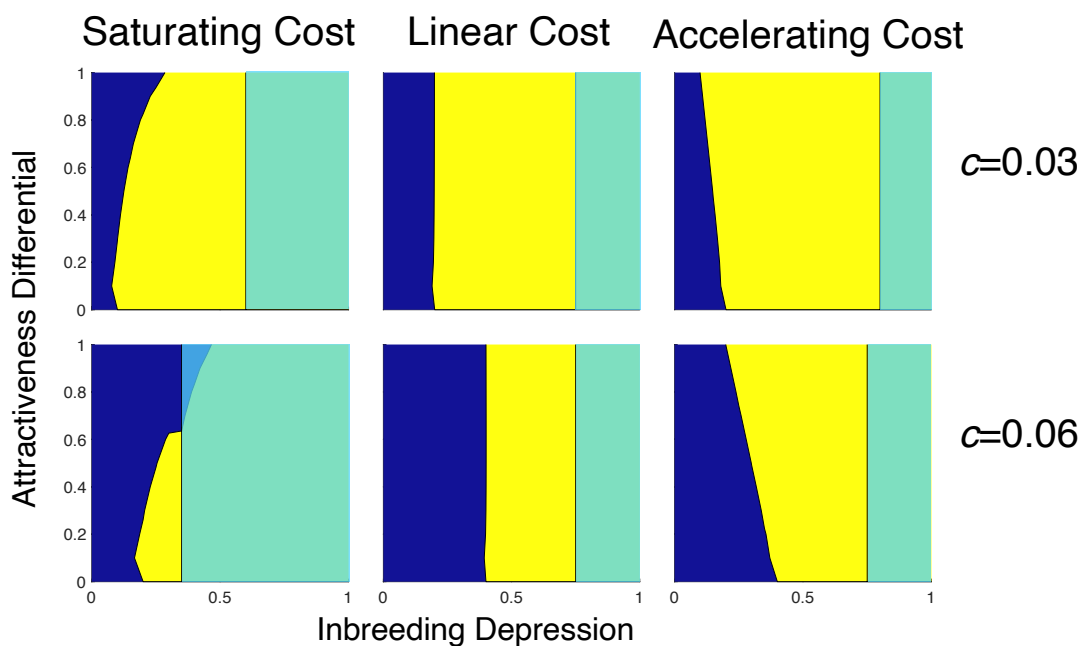

- Mutant increases when rare
- Mutant decreases when rare
- Resident extinct at equilibrium
- Resident extinct at equilibrium, but mutant invades

**Figure 3.** Pairwise invisibility plots for three different cost functions (saturating, linear, accelerating) and two maximum costs of attractiveness ( $c$ ). A. Resident is highly attractive ( $a_p = 0.8$ ). B. Resident is less attractive ( $a_p = 0.5$ ). Four possible outcomes are represented according to the figure legend: the mutant can successfully invade (increases when rare), the mutant cannot invade (decreases when rare), density of the resident is 0 at demographic equilibrium, and density where the resident is 0 but the mutant can invade.
